# Supplementary material
Source: PubMed Central journal article supplement (PMC2911646)
Supplement: NIHMS207212-supplement-Supp_Fig_s1.pdf [file NIHMS207212-supplement-Supp_Fig_s1.pdf]

Supplemental Figure 1. Cytokine profiles of CD8 T cells from Naive and LCMV-immune Mice

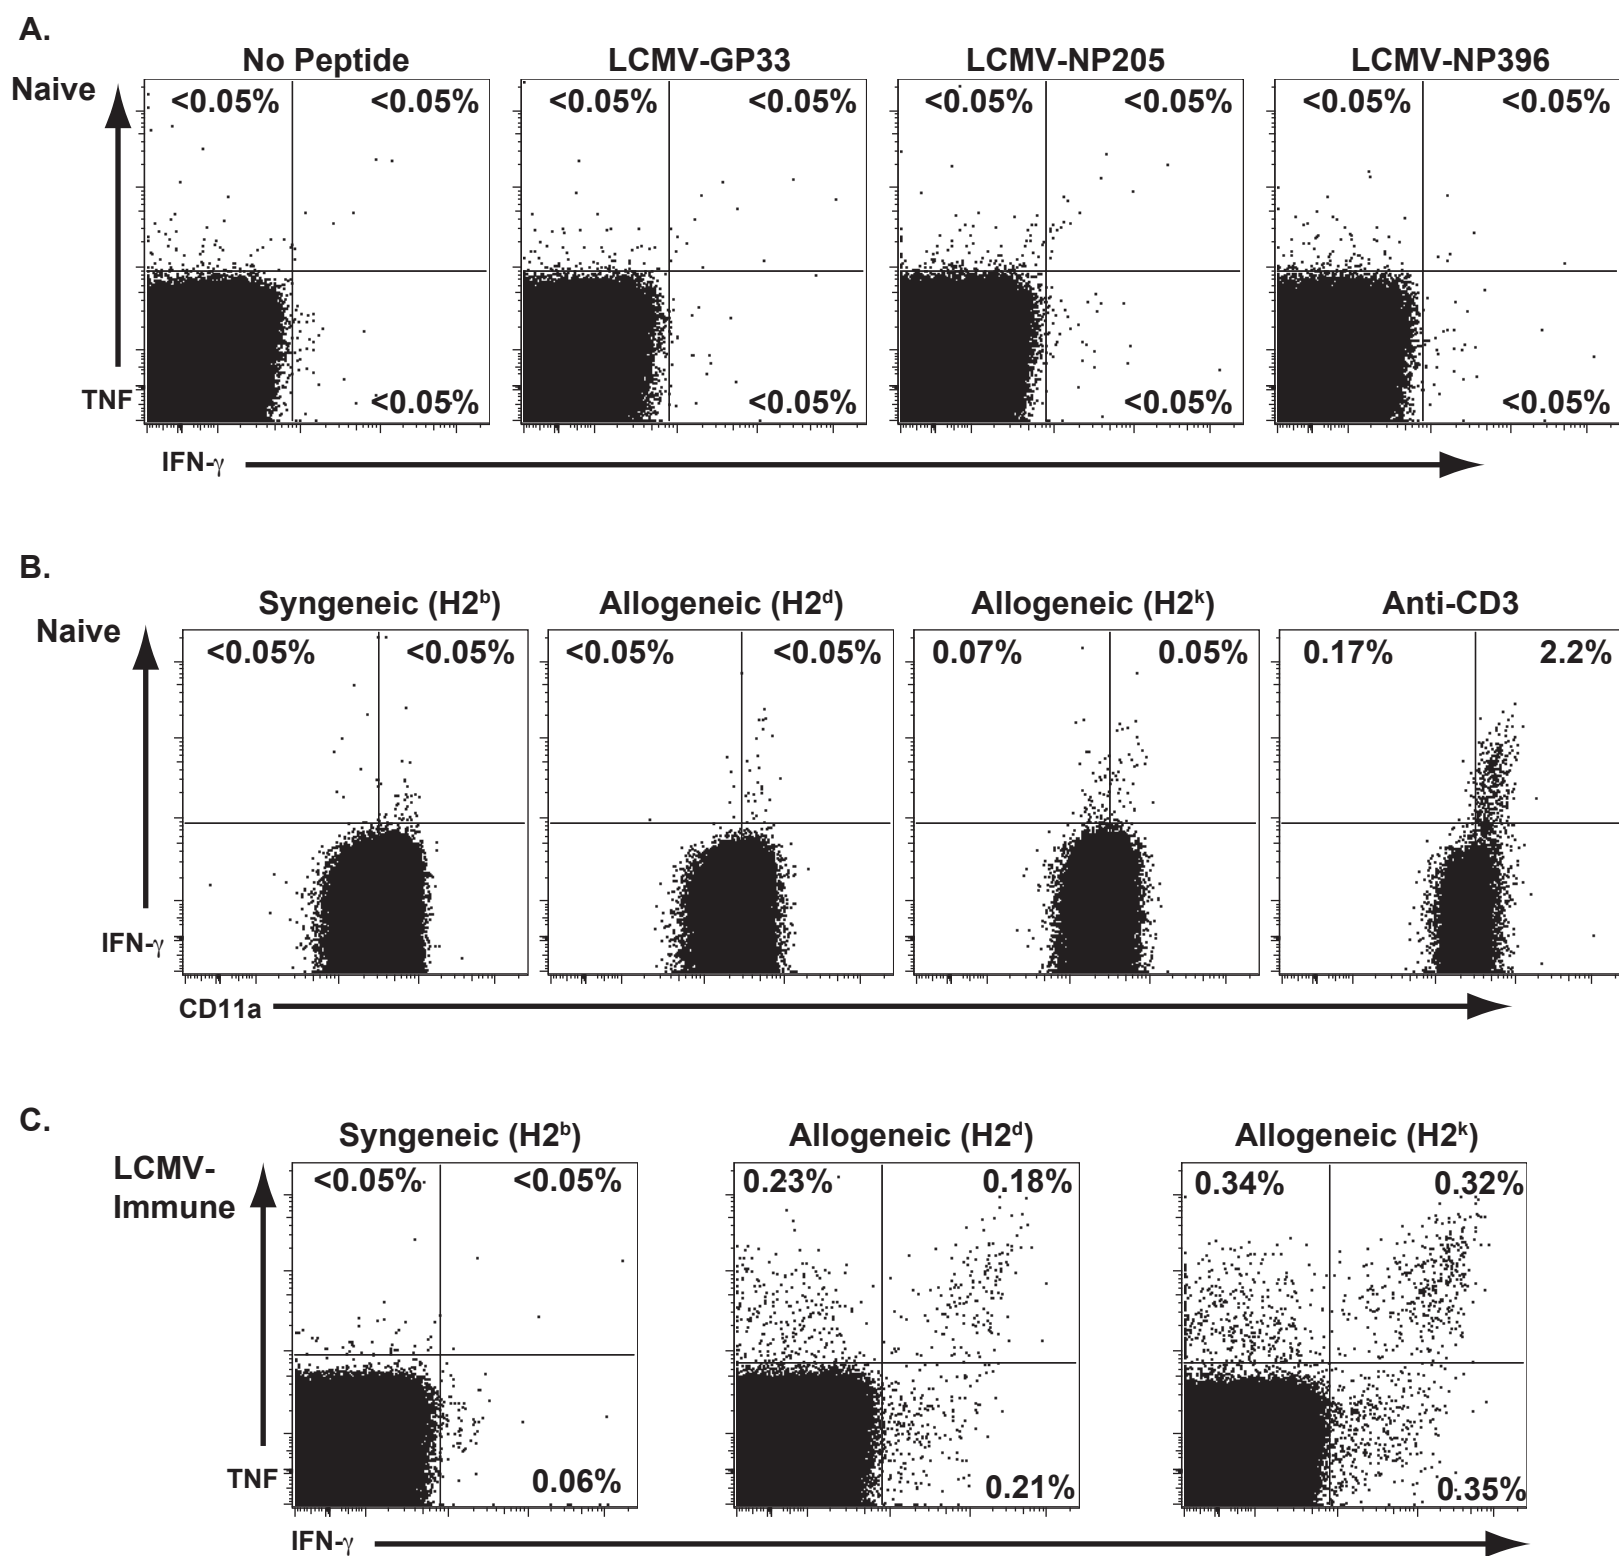

Splenocytes from naïve B6 mice (A and B) or LCMV-immune B6 mice (C) or naïve B6 mice (C) were stimulated with peptides or with splenocytes (allogeneic, irradiated LPS-treated cells) that were either syngeneic ( $H2^b$ ) or allogeneic (BALB/c,  $H2^d$  or CBA,  $H2^k$ ), as described in Materials and Methods. After culture, splenocytes were stained for cell surface markers and for intracellular IFN- $\gamma$  and TNF. For analysis, samples were gated on CD8<sup>+</sup> cells, and the values shown represent the percentage of CD8 T cells staining positive for either cytokine.
