# Supplementary material
Source: PubMed Central journal article supplement (PMC2911646)
Supplement: NIHMS207212-supplement-Supp_Fig_s2.pdf [file NIHMS207212-supplement-Supp_Fig_s2.pdf]

Supplemental Figure 2. CD8 T cells from Naive Mice Proliferate in Response to Alloantigens

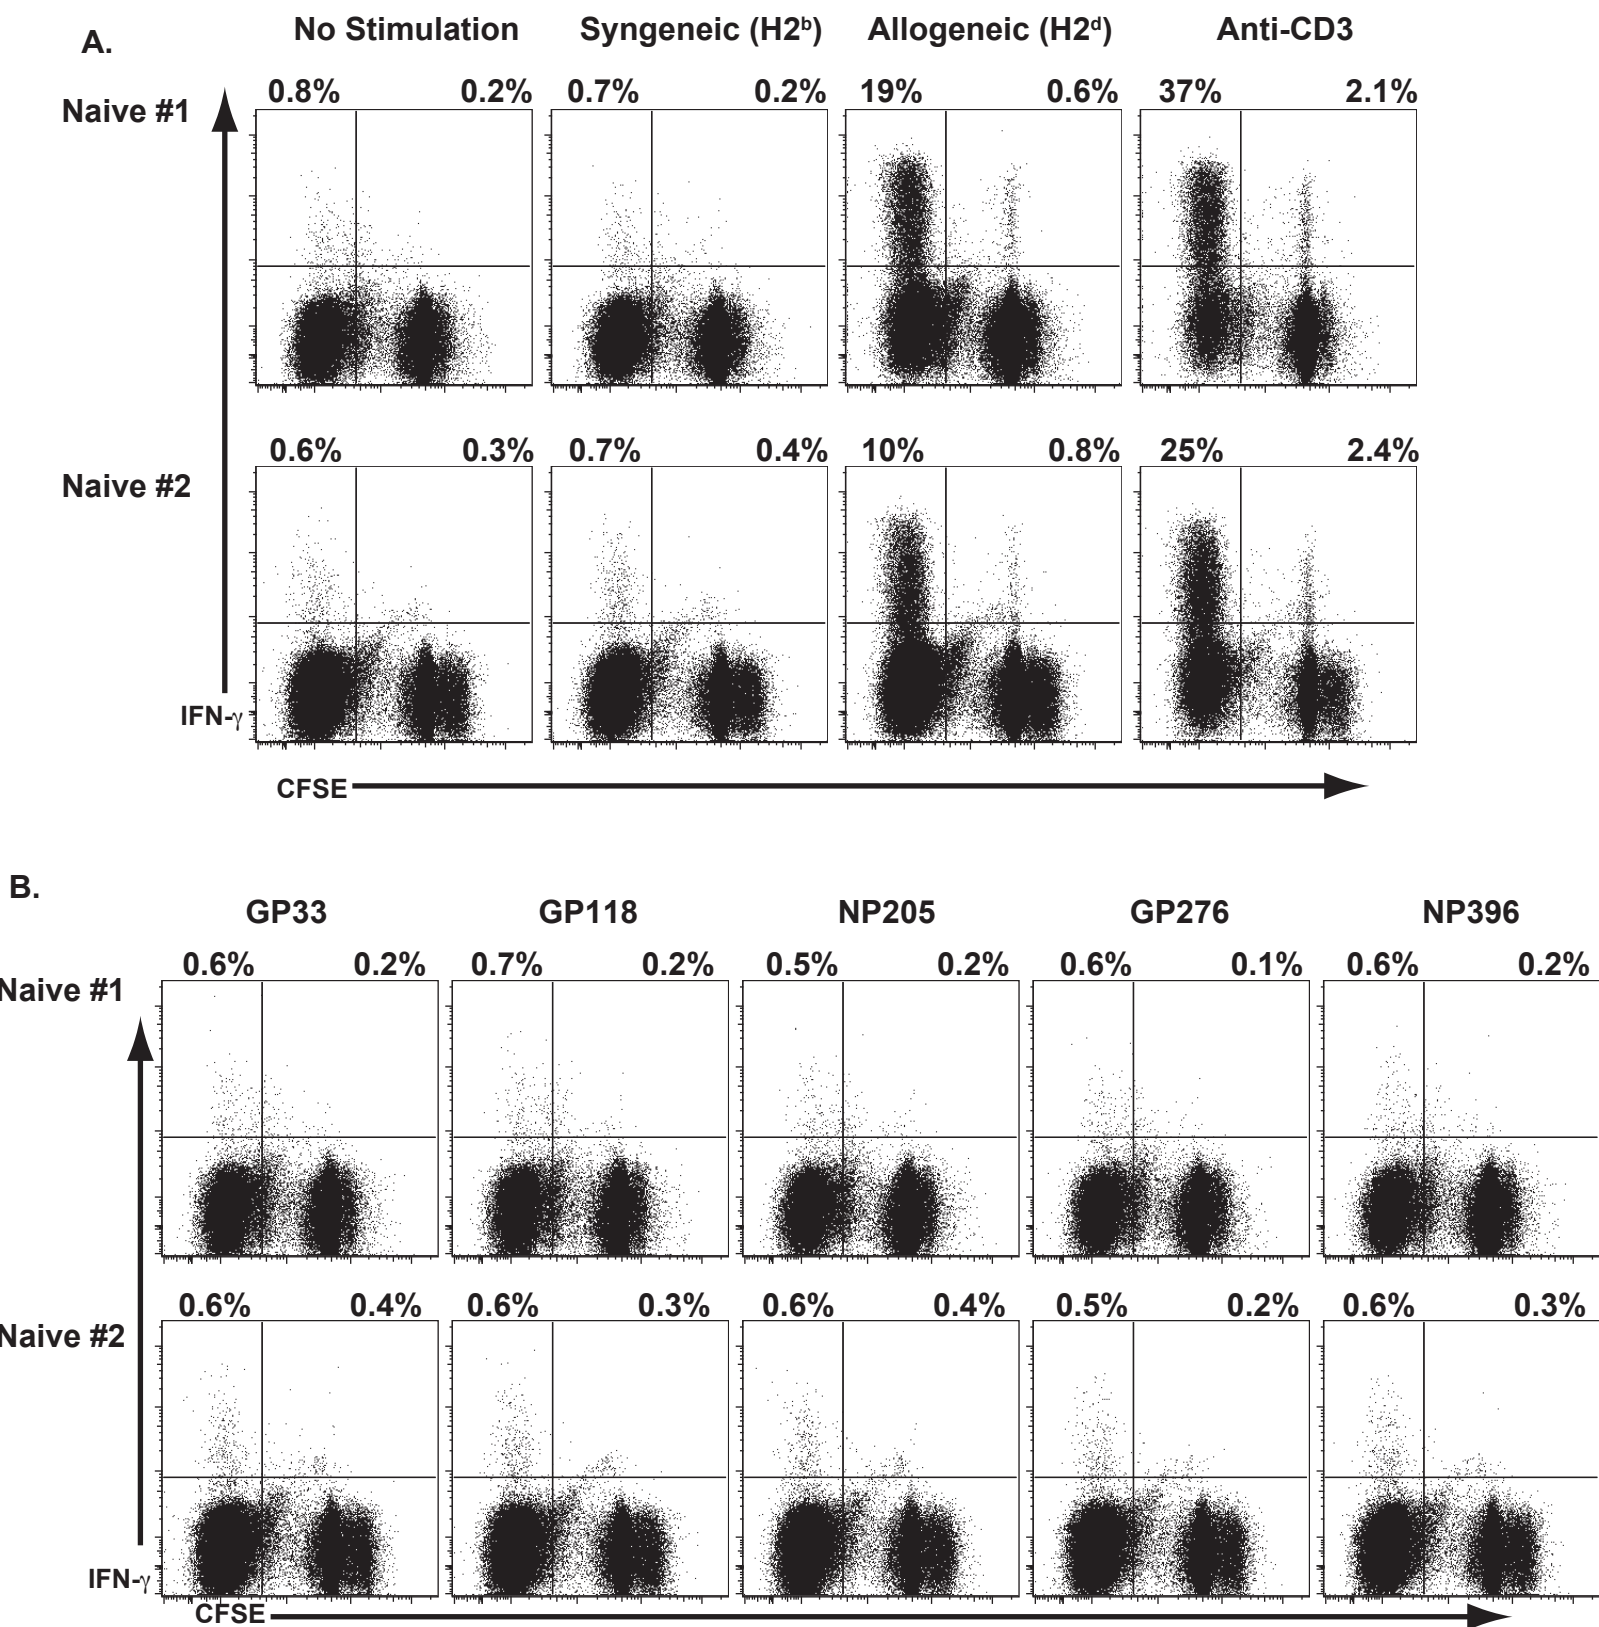

CFSE-labeled splenocytes from naive B6 mice were cultured in vitro for 6 days with P815 cells ( $H2^d$ ) as described in Materials and Methods. (A) Cultured cells were incubated with either syngeneic ( $H2^b$ ) or allogeneic ( $H2^d$ ) splenocytes or with a mAb specific for CD3 for 5 hr and then evaluated for the production of IFN- $\gamma$ . (B) Alternatively, cultured cells were incubated with the indicated peptides for 5 hr and then evaluated for the production of IFN- $\gamma$ . For the intracellular cytokine assays, samples were gated on CD8<sup>+</sup> cells, and the values shown represent the percentage of either CFSE<sup>lo</sup> or CFSE<sup>hi</sup> CD8 T cells staining positive for IFN- $\gamma$ .
