# Supplementary material
Source: PubMed Central journal article supplement (PMC2911646)
Supplement: NIHMS207212-supplement-Supp_Fig_s3.pdf [file NIHMS207212-supplement-Supp_Fig_s3.pdf]

# Supplemental Figure 3. Private Specificity of LCMV-Specific CD8 T cells Responding to Alloantigens In Vitro

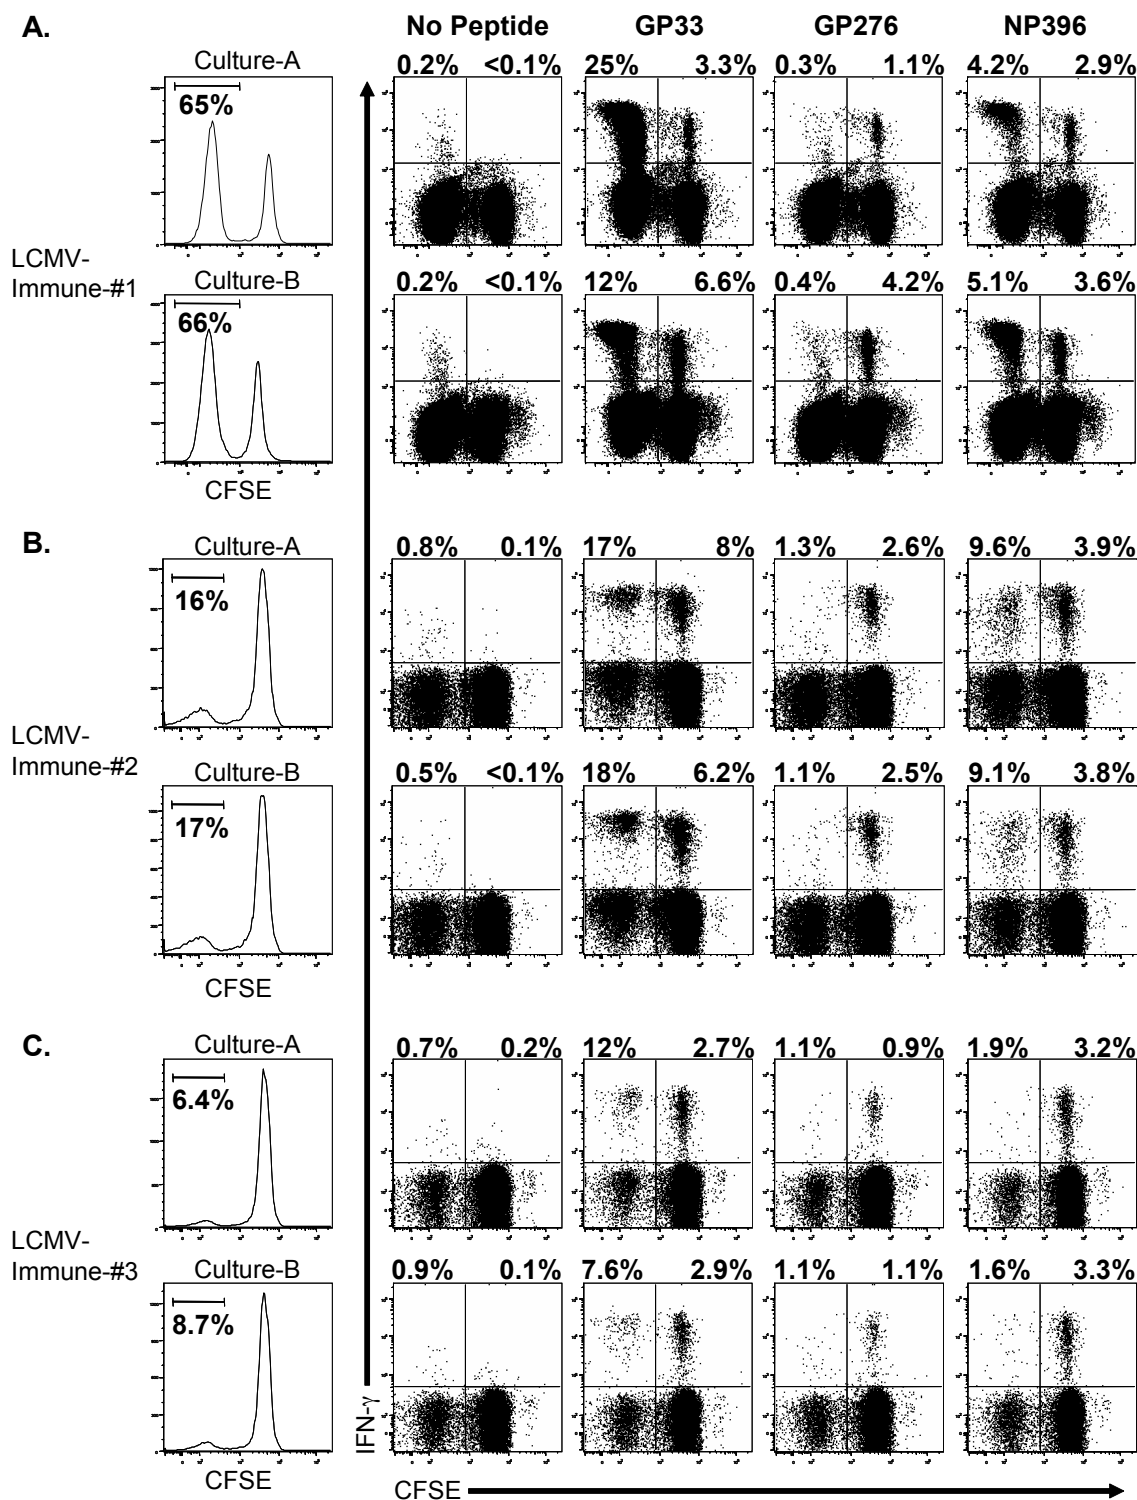

CFSE-labeled splenocytes from individual (A, B and C) LCMV-immune B6 mice were divided into separate cultures with P815 cells (*H2<sup>d</sup>*), as described in Materials and Methods. After 6 days, CD8 T cells were evaluated for division by dilution of CFSE, and the values represent the percentage of CD8 T cells that are CFSE<sup>lo</sup>. Cultured cells were incubated with the indicated peptides for 5 hr and then evaluated for the production of IFN- $\gamma$ . For analysis, samples were gated on CD8<sup>r</sup> cells, and the values shown represent the percentage of either CFSE<sup>lo</sup> or CFSE<sup>hi</sup> CD8 T cells staining positive for IFN- $\gamma$ .
